# Supplementary material for: Synergetic catalysis of p–d hybridized single-atom catalysts: first-principles investigations
Source: Royal Society of Chemistry journal article supplement (doi:10.1039/d2ta03368b), 2022-01-01
Supplement: d2ta03368b1.pdf [file d2ta03368b1.pdf]

## Electronic Supplementary Information for

# Synergetic Catalysis of *p-d* Hybridized Single-atom Catalysts: First-principles Investigations

Meng Deng<sup>#</sup>, Mengjiao Xia<sup>#</sup>, Yueyang Wang, Xiaoyan Ren<sup>\*</sup> and Shunfang Li<sup>\*</sup>

Key Laboratory of Material Physics, Ministry of Education, School of Physics and Microelectronics, Zhengzhou University, Zhengzhou 450001, China.

### This file includes:

**Table S1** Lattice parameter and pore size of TM-HHB Monolayer.

**Table S2** Bond lengths of each part of the structure when O<sub>2</sub> and CO are adsorbed.

**Fig. S1** MEP for the incoming CO molecule directly attacks the oxygen atom bonded with the Cr-SA site.

**Fig. S2** Minimum energy pathways (MEP) and corresponding energy barriers ( $E_{\text{bar}}$ ) for CO oxidation via L-H and E-R mechanism on 2D Cr-HHB without Hubbard U correction ( $U_{\text{eff}} = 0$  eV). For the second round of CO oxidation, the initial state (termed IS<sub>2</sub>) is based on the FS<sub>1</sub> with releasing the CO<sub>2</sub> molecule.

**Fig. S3** LPDOS of the CO and O<sub>2</sub> molecules about 5 Å above the Ni-HHB monolayer are also presented in blue and red solid lines, with the Fermi levels shifted to zero.

**Fig. S4** Charge transfer evolution of the key steps presented in the TER process of CO oxidation on Ni-HHB.

**Fig. S5** (a) Minimum energy pathways (MEP) and corresponding energy barriers ( $E_{\text{bar}}$ ) for CO oxidation via E-R and L-H mechanism on 2D Mo-HHB. For the second round of CO oxidation, the initial state (termed IS<sub>2</sub>) is based on the FS<sub>1</sub> with releasing the CO<sub>2</sub> molecule. Evolution of the  $\Delta Q$  in the key steps presented in the L-H processes of (b) the first and (c) the second round of CO oxidation on Mo-HHB.

**Table S1** Lattice parameter and pore size of TM-HHB Monolayer.

| TM-HHB             | Cr    | Mn    | Fe    | Co    | Ni    | Cu    | Mo    | Ru    | Rh   | Pd    | Ag    | Pt    | Au    |
|--------------------|-------|-------|-------|-------|-------|-------|-------|-------|------|-------|-------|-------|-------|
| Lattice (Å)        | 13.66 | 13.91 | 13.69 | 13.63 | 12.99 | 13.25 | 14.06 | 13.73 | 13.6 | 13.46 | 15.01 | 13.52 | 14.00 |
| D <sub>M</sub> (Å) | 6.83  | 6.93  | 6.85  | 6.82  | 6.50  | 6.63  | 7.03  | 6.86  | 6.80 | 6.73  | 7.50  | 6.76  | 7.00  |
| D <sub>P</sub> (Å) | 13.66 | 13.91 | 13.69 | 13.63 | 12.99 | 13.25 | 14.06 | 13.73 | 13.6 | 13.46 | 15.01 | 13.52 | 14.00 |

**Table S2** Bond lengths of each part of the structure when O<sub>2</sub> and CO are adsorbed.

| TM-HHB                       |                        | Cr   | Mn   | Fe   | Co   | Ru   | Rh   | Ni   | Cu   | Mo   |
|------------------------------|------------------------|------|------|------|------|------|------|------|------|------|
| Adsorption of O <sub>2</sub> | O <sub>2</sub> -TM (Å) | 1.98 | 2.13 | 1.96 | 2.03 | 1.94 | 2.00 | 2.89 | 2.62 | 1.93 |
|                              | O <sub>2</sub> -C (Å)  | 3.23 | 2.41 | 2.13 | 2.52 | 3.20 | 3.14 | 2.89 | 2.60 |      |
|                              | O-O (Å)                | 1.28 | 1.29 | 1.33 | 1.28 | 1.28 | 1.27 | 1.24 | 1.26 | 1.48 |
| Adsorption of CO             | C-TM (Å)               | 2.40 | 2.31 | 2.03 | 1.96 | 1.78 | 1.84 | 1.84 | 1.80 | 2.02 |
|                              | C-O (Å)                | 1.14 | 1.14 | 1.15 | 1.14 | 1.17 | 1.16 | 1.15 | 1.15 | 1.16 |

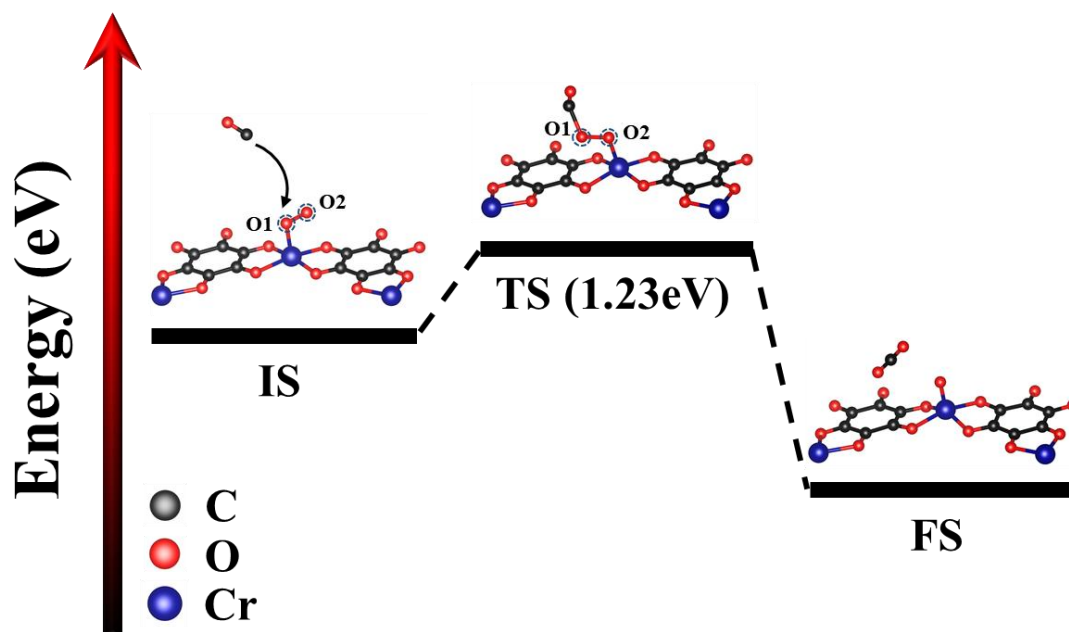**Fig. S1** MEP for the incoming CO molecule directly attacks the oxygen atom bonded with the Cr-SA site.

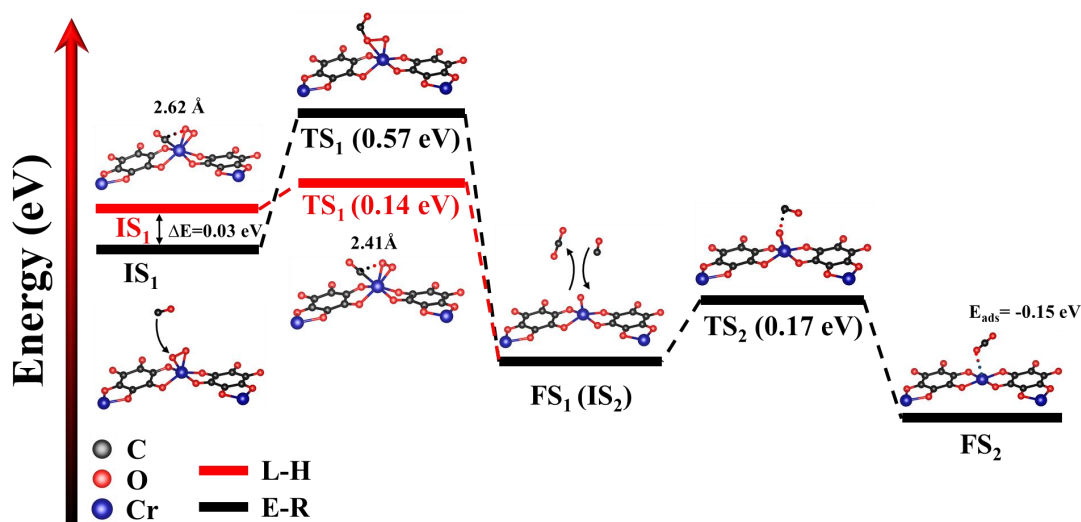

**Fig. S2** Minimum energy pathways (MEP) and corresponding energy barriers ( $E_{\text{bar}}$ ) for CO oxidation via L-H and E-R mechanism on 2D Cr-HHB without Hubbard U correction ( $U_{\text{eff}} = 0$  eV). For the second round of CO oxidation, the initial state (termed  $IS_2$ ) is based on the  $FS_1$  with releasing the  $CO_2$  molecule.

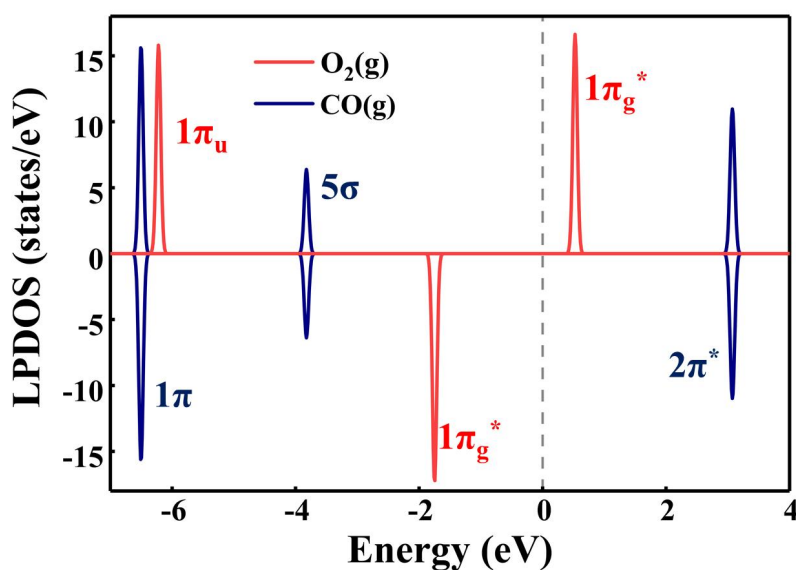

**Fig. S3** LPDOS of the CO and  $O_2$  molecules about 5 Å above the Ni-HHB monolayer are also presented in blue and red solid lines, with the Fermi levels shifted to zero.

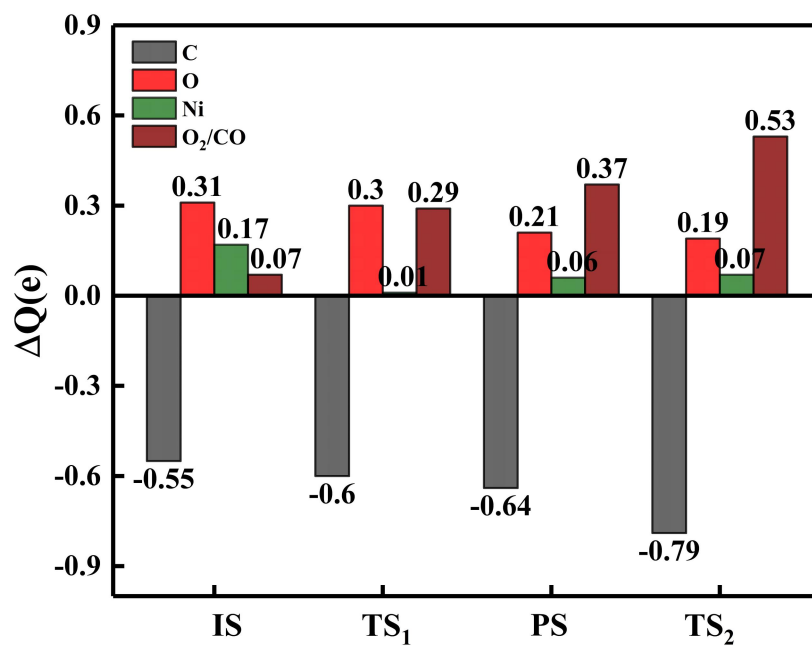

**Fig. S4** Charge transfer evolution of the key steps presented in the TER process of CO oxidation on Ni-HHB.

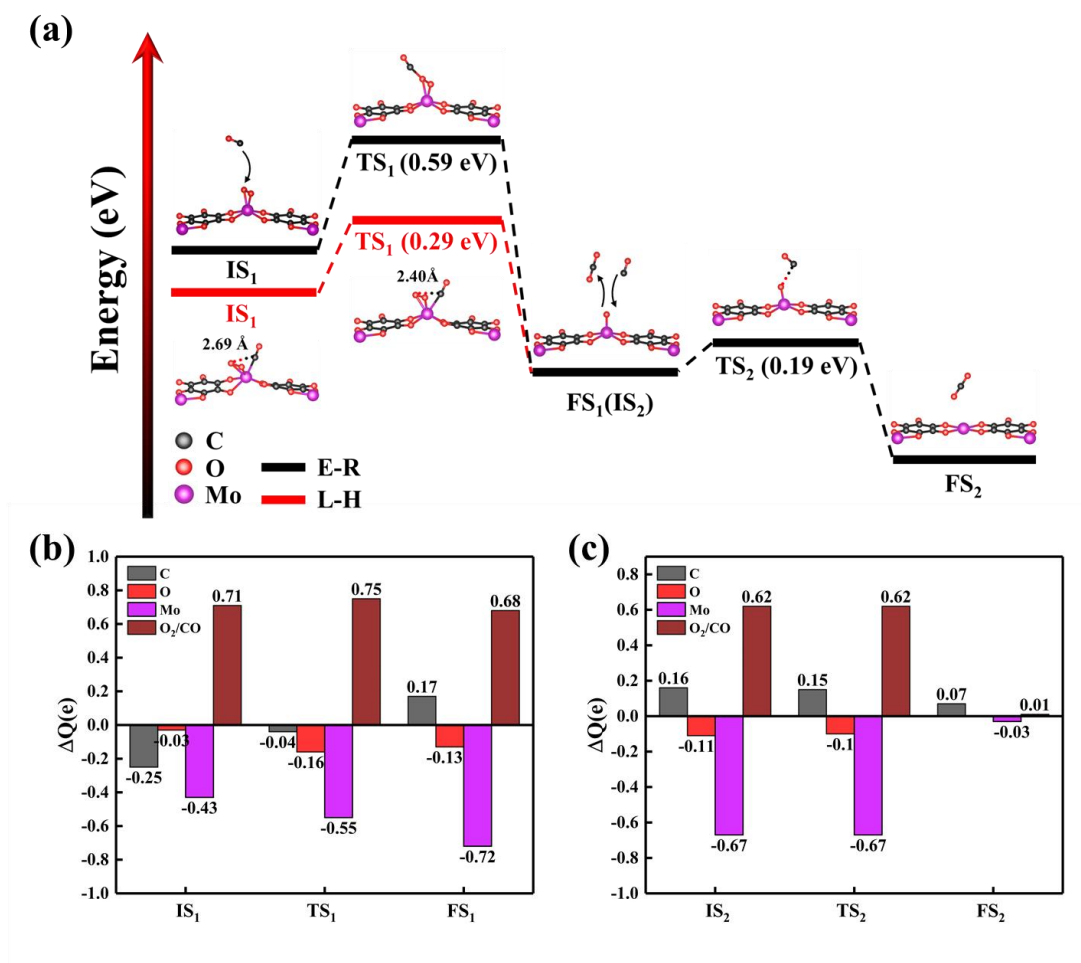

**Fig. S5** (a) Minimum energy pathways (MEP) and corresponding energy barriers ( $E_{\text{bar}}$ ) for CO oxidation via E-R and L-H mechanism on 2D Mo-HHB. For the second round of CO oxidation, the initial state (termed  $IS_2$ ) is based on the  $FS_1$  with releasing the  $CO_2$  molecule. Evolution of the  $\Delta Q$  in the key steps presented in the L-H processes of (b) the first and (c) the second round of CO oxidation on Mo-HHB.
